# Supplementary material for: Enhancing thermoelectric properties by using a surface polarization effect based on PEDOT:PSS thin films
Source: Royal Society of Chemistry journal article supplement (doi:10.1039/c8tc06616g), 2019-01-01
Supplement: c8tc06616g1.pdf [file c8tc06616g1.pdf]

**Supporting information**

**Enhancing thermoelectric properties by using surface  
polarization effect based on PEDOT:PSS thin film**

*Liping Peng<sup>a,b,\*</sup>, Zhitian Liu<sup>c</sup>*

<sup>a</sup> *School of Physics and Telecommunications, Huanggang Normal University, Hubei, Huanggang,  
43800, PR. China*

<sup>b</sup> *School of Materials Science and Engineering, Huazhong University of Science and Technology,  
Hubei, Wuhan, 430074, PR. China*

<sup>c</sup> *Materials Science and Engineering, Wuhan Institute of Technology, Wuhan 430205, PR. China*

## 1. Measure the output power of PEDOT:PSS device

When the different temperature get the 8 K of Al(hot)/PEDOT:PSS/Au(cold) device, the open-circuit voltage can get  $9\mu\text{V}$ , and the short-circuit current can get  $1.24\mu\text{A}$ , the output is change with the load resistance change, when the load resistance get the  $81\Omega$ , the output power get the most maximum of  $91\mu\text{W}$ , see the **Figure S1**.

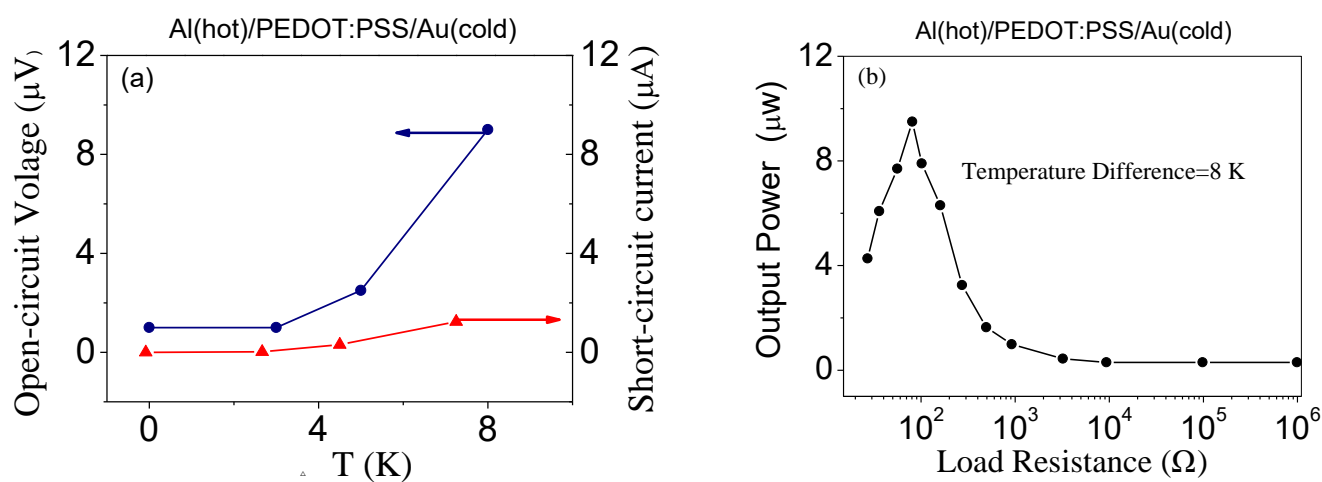

**Figure S1** (a) Output voltage and short-circuit current of Al(hot)/PEDOT:PSS/Au(cold) device under various temperature difference, (b) measured useful output power of Al(hot)/PEDOT:PSS/Au(cold) device with various resistance loads with the different temperature is 8 K.

## 2. Measure the Stability properties

In the post-synthesis cases, EG was added after the final solution was prepared. Amounts of EG was normalized to the amount (mass) of polymer present, the amount of TDAE was little. In the post-synthesis case, the amount of PEDOT:PSS in the resulting dry hybrid material was also determined again by TGA where the amount of PEDOT:PSS was taken as the amount that decomposes at low temperature ( $100\text{ }^{\circ}\text{C} < T < 190\text{ }^{\circ}\text{C}$ ) and the amount of EG was taken as the amount that decomposes at high temperatures ( $T > 190\text{ }^{\circ}\text{C}$ ). See sample TGA in **Figure S2**. So for normalization, an equivalent amount of EG was used to match the pre-synthesis cases.

In addition, the PEDOT:PSS showed good stability. We tested stability of power with increasing time and observed that under ambient atmosphere, it did not degrade after 2800 min at high temperature of  $150\text{ }^{\circ}\text{C}$ , as shown in **Figure S3**. Deduced half-lifetime is longer than 50 h.

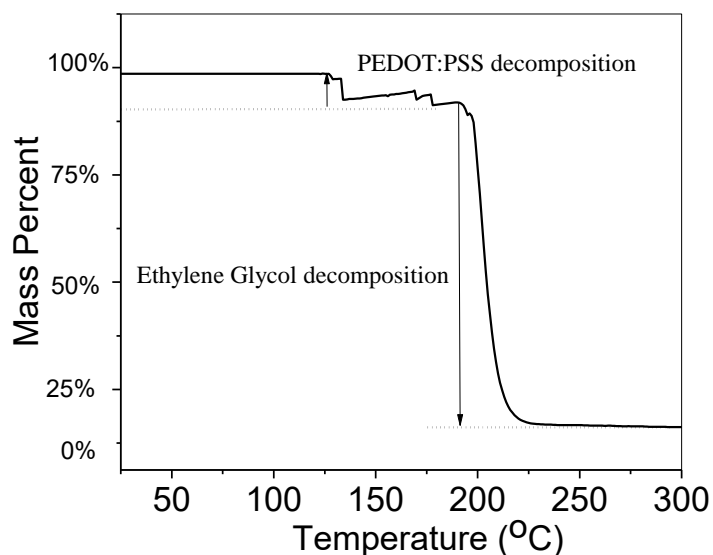

**Figure S2.** Example TGA of the EG hybrid material. The material was dried thoroughly before the TGA so there was no appreciable mass loss before  $110\text{ }^{\circ}\text{C}$ . Boiling point of EG is  $190\text{ }^{\circ}\text{C}$  which exceeds the temperature range of TGA. A slow temperature ramp rate ( $\sim 1\text{ }^{\circ}\text{C}/\text{min}$ ) was used to facilitate evaporation of EG.

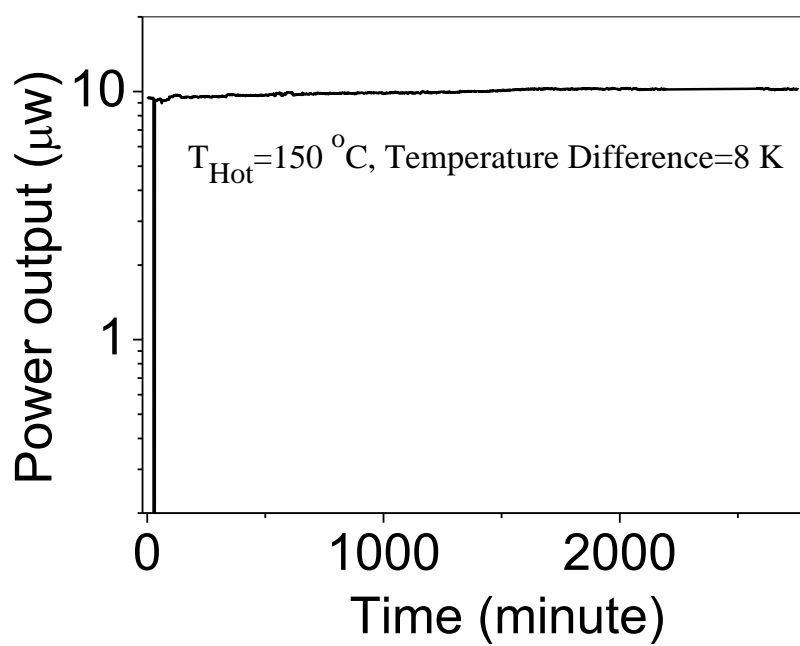

Figure S3. Output power stability of Al(hot)/PEDOT:PSS/Au(cold) device with hot-side temperature of 150 °C K and temperature difference of 8 K.
